# Supplementary material for: Biofeedback in the prophylactic treatment of medication overuse headache: a pilot randomized controlled trial
Source: PubMed Central journal article supplement (PMC5031562; doi:10.1186/s10194-016-0679-9), 2016-09-22
Supplement: 10194_2016_679_MOESM3_ESM.pdf [file 10194_2016_679_MOESM3_ESM.pdf]

## Modello lineare generalizzato

### Note

|                             |                                     |                                                                                                                                                                                                                                                                                                                                                                                                                                                             |
|-----------------------------|-------------------------------------|-------------------------------------------------------------------------------------------------------------------------------------------------------------------------------------------------------------------------------------------------------------------------------------------------------------------------------------------------------------------------------------------------------------------------------------------------------------|
| Input creato                |                                     | 19-JUN-2014 11:25:21                                                                                                                                                                                                                                                                                                                                                                                                                                        |
| Commenti                    |                                     |                                                                                                                                                                                                                                                                                                                                                                                                                                                             |
| Output                      | Dati                                | H:\• CARTELLE PERSONALI\Rausa Marialuisa\Articolo MIO\analisi statistiche\analisi luana\database completato maggio 2014.sav                                                                                                                                                                                                                                                                                                                                 |
|                             | File di dati attivo                 | FileDati1                                                                                                                                                                                                                                                                                                                                                                                                                                                   |
|                             | Filtro                              | <nessuno>                                                                                                                                                                                                                                                                                                                                                                                                                                                   |
|                             | Peso                                | <nessuno>                                                                                                                                                                                                                                                                                                                                                                                                                                                   |
|                             | Distingui                           | <nessuno>                                                                                                                                                                                                                                                                                                                                                                                                                                                   |
|                             | N. di righe nel file dati di lavoro | 31                                                                                                                                                                                                                                                                                                                                                                                                                                                          |
| Restrizione valori mancanti | Definizione di valore mancante      | I valori mancanti definiti dall'utente vengono considerati mancanti.                                                                                                                                                                                                                                                                                                                                                                                        |
|                             | Casi utilizzati                     | Le statistiche sono basate su tutti i casi con dati validi di tutte le variabili del modello.                                                                                                                                                                                                                                                                                                                                                               |
| Statistica                  |                                     | GLM FSkpr_T1 FSkpr_T3 FSkpr_T4<br>BY gruppi<br>/WSFACTOR=tempo 3 Polynomial<br>/MEASURE=pr<br>/METHOD=SSTYPE(3)<br>/EMMEANS=TABLES(gruppi)<br>COMPARE ADJ(BONFERRONI)<br>/EMMEANS=TABLES(tempo)<br>COMPARE ADJ(BONFERRONI)<br>/EMMEANS=TABLES(gruppi*tempo)<br>COMPARE(gruppi)<br>ADJ(BONFERRONI)<br>/EMMEANS=TABLES(gruppi*tempo)<br>COMPARE(tempo)<br>ADJ(BONFERRONI)<br>/PRINT=DESCRIPTIVE<br>/CRITERIA=ALPHA(.05)<br>/WSDESIGN=tempo<br>/DESIGN=gruppi. |
| Tempo                       | Tempo trascorso                     | 0:00:00,03                                                                                                                                                                                                                                                                                                                                                                                                                                                  |

FileDati1] H:\• CARTELLE PERSONALI\Rausa Marialuisa\Articolo MIO\analisi statistiche\analisi luana\database completato maggio 2014.sav

### Fattori entro soggettivo

Tempo: pr

| Tempo | Variabile dipendente |
|-------|----------------------|
|       | FSkpr_t1             |
|       | FSkpr_t3             |
|       | FSkpr_t4             |

### Fattori tra soggetti

|        |      | N  |
|--------|------|----|
| gruppi | 1,00 | 14 |
|        | 2,00 | 11 |

### Statistiche descrittive

| gruppi  |        | Media  | Deviazione std. | N  |
|---------|--------|--------|-----------------|----|
| skpr_t1 | 1,00   | 2,5207 | ,61216          | 14 |
|         | 2,00   | 2,5818 | ,94358          | 11 |
|         | Totale | 2,5476 | ,75823          | 25 |
| skpr_t3 | 1,00   | 2,6929 | ,65172          | 14 |
|         | 2,00   | 2,8655 | ,86738          | 11 |
|         | Totale | 2,7688 | ,74242          | 25 |
| skpr_t4 | 1,00   | 2,7171 | ,73545          | 14 |
|         | 2,00   | 2,7291 | ,73180          | 11 |
|         | Totale | 2,7224 | ,71844          | 25 |

### Test multivariati(b)

|              |                      | Valore | F        | Ipotesi df | Gradi di libertà dell'errore | Sig. |
|--------------|----------------------|--------|----------|------------|------------------------------|------|
| mpo          | Traccia di Pillai    | ,095   | 1,161(a) | 2,000      | 22,000                       | ,332 |
|              | Lambda di Wilks      | ,905   | 1,161(a) | 2,000      | 22,000                       | ,332 |
|              | Traccia di Hotelling | ,106   | 1,161(a) | 2,000      | 22,000                       | ,332 |
|              | Radice di Roy        | ,106   | 1,161(a) | 2,000      | 22,000                       | ,332 |
| mpo * gruppi | Traccia di Pillai    | ,023   | ,264(a)  | 2,000      | 22,000                       | ,770 |
|              | Lambda di Wilks      | ,977   | ,264(a)  | 2,000      | 22,000                       | ,770 |
|              | Traccia di Hotelling | ,024   | ,264(a)  | 2,000      | 22,000                       | ,770 |
|              | Radice di Roy        | ,024   | ,264(a)  | 2,000      | 22,000                       | ,770 |

Statistica esatta

Disegno: Intercept+gruppi

Disegno entro soggetti: tempo

### Test di sfericità di Mauchly(b)

Varianza: pr

| fetto entro soggetti | W di Mauchly | Approssimazione chi-quadrato | df | Sig. | Epsilon(a)         |             |                  |
|----------------------|--------------|------------------------------|----|------|--------------------|-------------|------------------|
|                      |              |                              |    |      | Greenhouse-Geisser | Huynh-Feldt | Limite inferiore |
| mpo                  | ,877         | 2,890                        | 2  | ,236 | ,890               | 1,000       | ,500             |

Significa l'ipotesi nulla per la quale la matrice di covarianza dell'errore della variabile dipendente trasformata ortonormalizzata è

porzionale a una matrice identità.

È possibile utilizzarlo per regolare i gradi di libertà per i test di significatività mediati. I test corretti vengono visualizzati nella tabella dei risultati sugli effetti entro soggetti.

Disegno: Intercept+gruppi

Disegno entro soggetti: tempo

### Test degli effetti entro soggetti

Disegno: pr

| Fattore        |                        | Somma dei quadrati Tipo III | df     | Media dei quadrati | F     | Sig. |
|----------------|------------------------|-----------------------------|--------|--------------------|-------|------|
| tempo          | Assumendo la sfericità | ,695                        | 2      | ,347               | 1,519 | ,230 |
|                | Greenhouse-Geisser     | ,695                        | 1,781  | ,390               | 1,519 | ,232 |
|                | Huynh-Feldt            | ,695                        | 2,000  | ,347               | 1,519 | ,230 |
|                | Limite inferiore       | ,695                        | 1,000  | ,695               | 1,519 | ,230 |
| tempo * gruppi | Assumendo la sfericità | ,083                        | 2      | ,042               | ,182  | ,834 |
|                | Greenhouse-Geisser     | ,083                        | 1,781  | ,047               | ,182  | ,809 |
|                | Huynh-Feldt            | ,083                        | 2,000  | ,042               | ,182  | ,834 |
|                | Limite inferiore       | ,083                        | 1,000  | ,083               | ,182  | ,673 |
| errore(tempo)  | Assumendo la sfericità | 10,521                      | 46     | ,229               |       |      |
|                | Greenhouse-Geisser     | 10,521                      | 40,959 | ,257               |       |      |
|                | Huynh-Feldt            | 10,521                      | 46,000 | ,229               |       |      |
|                | Limite inferiore       | 10,521                      | 23,000 | ,457               |       |      |

### Test dei contrasti entro soggetti

Disegno: pr

| Fattore        |            | Somma dei quadrati Tipo III | df | Media dei quadrati | F     | Sig. |
|----------------|------------|-----------------------------|----|--------------------|-------|------|
| tempo          | Lineare    | ,364                        | 1  | ,364               | 1,329 | ,261 |
|                | Quadratico | ,331                        | 1  | ,331               | 1,803 | ,192 |
| tempo * gruppi | Lineare    | ,007                        | 1  | ,007               | ,027  | ,870 |
|                | Quadratico | ,076                        | 1  | ,076               | ,414  | ,526 |
| errore(tempo)  | Lineare    | 6,298                       | 23 | ,274               |       |      |
|                | Quadratico | 4,223                       | 23 | ,184               |       |      |

### Test degli effetti fra soggetti

Disegno: pr

Disegno trasformato: Media

| Fattore    | Somma dei quadrati Tipo III | df | Media dei quadrati | F       | Sig. |
|------------|-----------------------------|----|--------------------|---------|------|
| intercetta | 532,713                     | 1  | 532,713            | 427,125 | ,000 |
| gruppi     | ,124                        | 1  | ,124               | ,099    | ,755 |
| errore     | 28,686                      | 23 | 1,247              |         |      |

### Medie marginali attese

## gruppi

### Stime

ura: pr

| gruppi | Media | Errore std. | Intervallo di confidenza<br>95% |                  |
|--------|-------|-------------|---------------------------------|------------------|
|        |       |             | Limite inferiore                | Limite superiore |
| 00     | 2,644 | ,172        | 2,287                           | 3,000            |
| 00     | 2,725 | ,194        | 2,323                           | 3,128            |

### Confronti a coppie

ura: pr

| gruppi | (J) gruppi | Differenza fra medie (I-J) | Errore std. | Sig.(a) | Intervallo di confidenza per la differenza al 95%(a) |                  |
|--------|------------|----------------------------|-------------|---------|------------------------------------------------------|------------------|
|        |            |                            |             |         | Limite inferiore                                     | Limite superiore |
| 00     | 2,00       | -,082                      | ,260        | ,755    | -,619                                                | ,456             |
| 00     | 1,00       | ,082                       | ,260        | ,755    | -,456                                                | ,619             |

ato sulle medie marginali stimate

orrezione per confronti multipli: Bonferroni.

### Test univariati

ura: pr

|          | Somma dei quadrati | df | Media dei quadrati | F    | Sig. |
|----------|--------------------|----|--------------------|------|------|
| ontrasto | ,041               | 1  | ,041               | ,099 | ,755 |
| rore     | 9,562              | 23 | ,416               |      |      |

scun F verifica gli effetti semplici di gruppi all'interno di ogni combinazione di livelli degli altri effetti illustrati. Questi test sono basati confronti a coppie indipendenti e lineari tra le medie marginali stimate.

## tempo

### Stime

ura: pr

| mpo | Media | Errore std. | Intervallo di confidenza<br>95% |                  |
|-----|-------|-------------|---------------------------------|------------------|
|     |       |             | Limite inferiore                | Limite superiore |
|     | 2,551 | ,156        | 2,229                           | 2,874            |
|     | 2,779 | ,152        | 2,465                           | 3,093            |
|     | 2,723 | ,148        | 2,417                           | 3,029            |

### Confronti a coppie

ura: pr

| tempo | (J) tempo | Differenza fra medie (I-J) | Errore std. | Sig.(a) | Intervallo di confidenza per la differenza al 95%(a) |                  |
|-------|-----------|----------------------------|-------------|---------|------------------------------------------------------|------------------|
|       |           |                            |             |         | Limite inferiore                                     | Limite superiore |
| 2     | 3         | -,228                      | ,146        | ,399    | -,606                                                | ,150             |
| 3     | 1         | -,172                      | ,149        | ,783    | -,557                                                | ,213             |
| 1     | 3         | ,228                       | ,146        | ,399    | -,150                                                | ,606             |
| 3     | 1         | ,056                       | ,110        | 1,000   | -,228                                                | ,340             |
| 1     | 2         | ,172                       | ,149        | ,783    | -,213                                                | ,557             |
| 2     | 3         | -,056                      | ,110        | 1,000   | -,340                                                | ,228             |

iato sulle medie marginali stimate

Correzione per confronti multipli: Bonferroni.

### Test multivariati

|                    | Valore | F        | Ipotesi df | Gradi di libertà dell'errore | Sig. |
|--------------------|--------|----------|------------|------------------------------|------|
| accia di Pillai    | ,095   | 1,161(a) | 2,000      | 22,000                       | ,332 |
| imbdia di Wilks    | ,905   | 1,161(a) | 2,000      | 22,000                       | ,332 |
| accia di Hotelling | ,106   | 1,161(a) | 2,000      | 22,000                       | ,332 |
| ndice di Roy       | ,106   | 1,161(a) | 2,000      | 22,000                       | ,332 |

scun F verifica l'effetto multivariato di tempo. Questi test sono basati sui confronti a coppie indipendenti e lineari tra le medie rginali stimate.

Statistiche esatte

## gruppi \* tempo

### Stime

ura: pr

| gruppi | tempo | Media | Errore std. | Intervallo di confidenza 95% |                  |
|--------|-------|-------|-------------|------------------------------|------------------|
|        |       |       |             | Limite inferiore             | Limite superiore |
| 00     | 1     | 2,521 | ,207        | 2,093                        | 2,949            |
|        | 2     | 2,693 | ,201        | 2,276                        | 3,109            |
|        | 3     | 2,717 | ,196        | 2,311                        | 3,123            |
| 00     | 1     | 2,582 | ,233        | 2,099                        | 3,065            |
|        | 2     | 2,865 | ,227        | 2,396                        | 3,335            |
|        | 3     | 2,729 | ,221        | 2,271                        | 3,187            |

### Confronti a coppie

ura: pr

| tempo | (I) gruppi | (J) gruppi | Differenza fra medie (I-J) | Errore std. | Sig.(a) | Intervallo di confidenza per la differenza al 95%(a) |
|-------|------------|------------|----------------------------|-------------|---------|------------------------------------------------------|
|-------|------------|------------|----------------------------|-------------|---------|------------------------------------------------------|

|      |      |       |      |      | Limite inferiore | Limite superiore |
|------|------|-------|------|------|------------------|------------------|
| 1,00 | 2,00 | -,061 | ,312 | ,846 | -,706            | ,584             |
| 2,00 | 1,00 | ,061  | ,312 | ,846 | -,584            | ,706             |
| 1,00 | 2,00 | -,173 | ,303 | ,575 | -,800            | ,455             |
| 2,00 | 1,00 | ,173  | ,303 | ,575 | -,455            | ,800             |
| 1,00 | 2,00 | -,012 | ,296 | ,968 | -,624            | ,600             |
| 2,00 | 1,00 | ,012  | ,296 | ,968 | -,600            | ,624             |

basato sulle medie marginali stimate

Correzione per confronti multipli: Bonferroni.

### Test univariati

Varianza: pr

| Gruppo    | Somma dei quadrati | df | Media dei quadrati | F    | Sig. |
|-----------|--------------------|----|--------------------|------|------|
| Contrasto | ,023               | 1  | ,023               | ,038 | ,846 |
| Errore    | 13,775             | 23 | ,599               |      |      |
| Contrasto | ,184               | 1  | ,184               | ,324 | ,575 |
| Errore    | 13,045             | 23 | ,567               |      |      |
| Contrasto | ,001               | 1  | ,001               | ,002 | ,968 |
| Errore    | 12,387             | 23 | ,539               |      |      |

Verifica l'effetto di gruppi. Questo test è basato sui confronti a coppie indipendenti e lineari tra le medie marginali stimate.

## gruppi \* tempo

### Stime

Varianza: pr

| Gruppi | tempo | Media | Errore std. | Intervallo di confidenza 95% |                  |
|--------|-------|-------|-------------|------------------------------|------------------|
|        |       |       |             | Limite inferiore             | Limite superiore |
| 100    | 1     | 2,521 | ,207        | 2,093                        | 2,949            |
|        | 2     | 2,693 | ,201        | 2,276                        | 3,109            |
|        | 3     | 2,717 | ,196        | 2,311                        | 3,123            |
| 200    | 1     | 2,582 | ,233        | 2,099                        | 3,065            |
|        | 2     | 2,865 | ,227        | 2,396                        | 3,335            |
|        | 3     | 2,729 | ,221        | 2,271                        | 3,187            |

### Confronti a coppie

Varianza: pr

| Gruppi | (I) tempo | (J) tempo | Differenza fra medie (I-J) | Errore std. | Sig.(a) | Intervallo di confidenza per la differenza al 95%(a) |                  |
|--------|-----------|-----------|----------------------------|-------------|---------|------------------------------------------------------|------------------|
|        |           |           |                            |             |         | Limite inferiore                                     | Limite superiore |
| 100    | 1         | 2         | -,172                      | ,194        | 1,000   | -,673                                                | ,329             |
|        |           | 3         | -,196                      | ,198        | ,993    | -,707                                                | ,314             |

|    |   |   |       |      |       |       |      |
|----|---|---|-------|------|-------|-------|------|
|    | 2 | 1 | ,172  | ,194 | 1,000 | -,329 | ,673 |
|    |   | 3 | -,024 | ,146 | 1,000 | -,401 | ,352 |
|    | 3 | 1 | ,196  | ,198 | ,993  | -,314 | ,707 |
|    |   | 2 | ,024  | ,146 | 1,000 | -,352 | ,401 |
| 00 | 1 | 2 | -,284 | ,219 | ,624  | -,849 | ,282 |
|    |   | 3 | -,147 | ,223 | 1,000 | -,723 | ,429 |
|    | 2 | 1 | ,284  | ,219 | ,624  | -,282 | ,849 |
|    |   | 3 | ,136  | ,164 | 1,000 | -,288 | ,561 |
|    | 3 | 1 | ,147  | ,223 | 1,000 | -,429 | ,723 |
|    |   | 2 | -,136 | ,164 | 1,000 | -,561 | ,288 |

basato sulle medie marginali stimate

Correzione per confronti multipli: Bonferroni.

### Test multivariati

|    |                      | Valore | F       | Ipotesi df | Gradi di libertà dell'errore | Sig. |
|----|----------------------|--------|---------|------------|------------------------------|------|
| 00 | Traccia di Pillai    | ,043   | ,500(a) | 2,000      | 22,000                       | ,613 |
|    | Lambda di Wilks      | ,957   | ,500(a) | 2,000      | 22,000                       | ,613 |
|    | Traccia di Hotelling | ,045   | ,500(a) | 2,000      | 22,000                       | ,613 |
|    | Radice di Roy        | ,045   | ,500(a) | 2,000      | 22,000                       | ,613 |
| 00 | Traccia di Pillai    | ,074   | ,880(a) | 2,000      | 22,000                       | ,429 |
|    | Lambda di Wilks      | ,926   | ,880(a) | 2,000      | 22,000                       | ,429 |
|    | Traccia di Hotelling | ,080   | ,880(a) | 2,000      | 22,000                       | ,429 |
|    | Radice di Roy        | ,080   | ,880(a) | 2,000      | 22,000                       | ,429 |

Lo scun F verifica gli effetti multivariati semplici di tempo all'interno di ogni combinazione di livelli degli effetti illustrati. Questi test sono basati sui confronti a coppie indipendenti e lineari tra le medie marginali stimate.

La statistica esatta

## Modello lineare generalizzato

### Note

|                             |                                     |                                                                                                                             |
|-----------------------------|-------------------------------------|-----------------------------------------------------------------------------------------------------------------------------|
| Output creato               |                                     | 19-JUN-2014 11:28:08                                                                                                        |
| Commenti                    |                                     |                                                                                                                             |
| Output                      | Dati                                | H:\• CARTELLE PERSONALI\Rausa Marialuisa\Articolo MIO\analisi statistiche\analisi luana\database completato maggio 2014.sav |
|                             | File di dati attivo                 | FileDati1                                                                                                                   |
|                             | Filtro                              | <nessuno>                                                                                                                   |
|                             | Peso                                | <nessuno>                                                                                                                   |
|                             | Distingui                           | <nessuno>                                                                                                                   |
|                             | N. di righe nel file dati di lavoro | 31                                                                                                                          |
| Restrizione valori mancanti | Definizione di valore mancante      | I valori mancanti definiti dall'utente vengono considerati mancanti.                                                        |
|                             | Casi utilizzati                     | Le statistiche sono basate su tutti i casi con dati validi di tutte le variabili del modello.                               |

|        |                                                                                                                                                                                                                                                                                                                                                                                                                                                            |            |
|--------|------------------------------------------------------------------------------------------------------------------------------------------------------------------------------------------------------------------------------------------------------------------------------------------------------------------------------------------------------------------------------------------------------------------------------------------------------------|------------|
| ntassi | GLM FSkmr_T1 FSkmr_T3<br>FSkmr_T4 BY gruppi<br>/WSFACTOR=tempo 3 Polynomial<br>/MEASURE=mr<br>/METHOD=SSTYPE(3)<br>/EMMEANS=TABLES(gruppi)<br>COMPARE ADJ(BONFERRONI)<br>/EMMEANS=TABLES(tempo)<br>COMPARE ADJ(BONFERRONI)<br>/EMMEANS=TABLES(gruppi*tempo)<br>COMPARE(gruppi)<br>ADJ(BONFERRONI)<br>/EMMEANS=TABLES(gruppi*tempo)<br>COMPARE(tempo)<br>ADJ(BONFERRONI)<br>/PRINT=DESCRIPTIVE<br>/CRITERIA=ALPHA(.05)<br>/WSDSIGN=tempo<br>/DESIGN=gruppi. |            |
| sorse  | Tempo trascorso                                                                                                                                                                                                                                                                                                                                                                                                                                            | 0:00:00,03 |

fileDati1] H:\• CARTELLE PERSONALI\Rausa Marialuisa\Articolo MIO\analisi  
atistiche\analisi luana\database completato maggio 2014.sav

#### Fattori entro soggettico

ura: mr

| mpo | Variabile<br>dipendente          |
|-----|----------------------------------|
|     | FSkmr_t1<br>FSkmr_t3<br>FSkmr_t4 |

#### Fattori tra soggetti

|        |      | N  |
|--------|------|----|
| gruppi | 1,00 | 15 |
|        | 2,00 | 11 |

#### Statistiche descrittive

| gruppi  |        | Media  | Deviazione<br>std. | N  |
|---------|--------|--------|--------------------|----|
| skmr_t1 | 1,00   | 2,3527 | ,86437             | 15 |
|         | 2,00   | 2,9336 | ,92911             | 11 |
|         | Totale | 2,5985 | ,92161             | 26 |
| skmr_t3 | 1,00   | 1,9273 | ,99106             | 15 |
|         | 2,00   | 2,7791 | ,92390             | 11 |
|         | Totale | 2,2877 | 1,03713            | 26 |
| skmr_t4 | 1,00   | 1,7187 | ,82411             | 15 |



|        |        |        |    |
|--------|--------|--------|----|
| 2,00   | 2,6764 | ,61917 | 11 |
| Totale | 2,1238 | ,87550 | 26 |

### Test multivariati(b)

|              |                      | Valore | F        | Ipotesi df | Gradi di libertà dell'errore | Sig. |
|--------------|----------------------|--------|----------|------------|------------------------------|------|
| mpo          | Traccia di Pillai    | ,181   | 2,546(a) | 2,000      | 23,000                       | ,100 |
|              | Lambda di Wilks      | ,819   | 2,546(a) | 2,000      | 23,000                       | ,100 |
|              | Traccia di Hotelling | ,221   | 2,546(a) | 2,000      | 23,000                       | ,100 |
|              | Radice di Roy        | ,221   | 2,546(a) | 2,000      | 23,000                       | ,100 |
| mpo * gruppi | Traccia di Pillai    | ,038   | ,456(a)  | 2,000      | 23,000                       | ,640 |
|              | Lambda di Wilks      | ,962   | ,456(a)  | 2,000      | 23,000                       | ,640 |
|              | Traccia di Hotelling | ,040   | ,456(a)  | 2,000      | 23,000                       | ,640 |
|              | Radice di Roy        | ,040   | ,456(a)  | 2,000      | 23,000                       | ,640 |

Statistica esatta

Disegno: Intercept+gruppi

Disegno entro soggetti: tempo

### Test di sfericità di Mauchly(b)

Disegno: mr

| Effetto | W di Mauchly | Approssimazione chi-quadrato | df | Sig. | Epsilon(a)         |             |                  |
|---------|--------------|------------------------------|----|------|--------------------|-------------|------------------|
|         |              |                              |    |      | Greenhouse-Geisser | Huynh-Feldt | Limite inferiore |
| mpo     | ,952         | 1,139                        | 2  | ,566 | ,954               | 1,000       | ,500             |

Il test verifica l'ipotesi nulla per la quale la matrice di covarianza dell'errore della variabile dipendente trasformata ortonormalizzata è proporzionale a una matrice identità.

È possibile utilizzarlo per regolare i gradi di libertà per i test di significatività mediati. I test corretti vengono visualizzati nella tabella dei risultati sugli effetti entro soggetti.

Disegno: Intercept+gruppi

Disegno entro soggetti: tempo

### Test degli effetti entro soggetti

Disegno: mr

| Effetto       |                        | Somma dei quadrati Tipo III | df    | Media dei quadrati | F     | Sig. |
|---------------|------------------------|-----------------------------|-------|--------------------|-------|------|
| mpo           | Assumendo la sfericità | 2,597                       | 2     | 1,298              | 2,879 | ,066 |
|               | Greenhouse-Geisser     | 2,597                       | 1,908 | 1,361              | 2,879 | ,069 |
|               | Huynh-Feldt            | 2,597                       | 2,000 | 1,298              | 2,879 | ,066 |
|               | Limite inferiore       | 2,597                       | 1,000 | 2,597              | 2,879 | ,103 |
| mpo * gruppi  | Assumendo la sfericità | ,479                        | 2     | ,240               | ,531  | ,591 |
|               | Greenhouse-Geisser     | ,479                        | 1,908 | ,251               | ,531  | ,583 |
|               | Huynh-Feldt            | ,479                        | 2,000 | ,240               | ,531  | ,591 |
|               | Limite inferiore       | ,479                        | 1,000 | ,479               | ,531  | ,473 |
| errore(tempo) | Assumendo la sfericità | 21,650                      | 48    | ,451               |       |      |

|                    |        |        |      |  |
|--------------------|--------|--------|------|--|
| Greenhouse-Geisser | 21,650 | 45,788 | ,473 |  |
| Huynh-Feldt        | 21,650 | 48,000 | ,451 |  |
| Limite inferiore   | 21,650 | 24,000 | ,902 |  |

### Test dei contrasti entro soggetti

ura: mr

| urgente      | tempo      | Somma dei quadrati Tipo III | df | Media dei quadrati | F     | Sig. |
|--------------|------------|-----------------------------|----|--------------------|-------|------|
| mpo          | Lineare    | 2,521                       | 1  | 2,521              | 5,309 | ,030 |
|              | Quadratico | ,076                        | 1  | ,076               | ,178  | ,676 |
| mpo * gruppi | Lineare    | ,450                        | 1  | ,450               | ,948  | ,340 |
|              | Quadratico | ,029                        | 1  | ,029               | ,067  | ,798 |
| rore(tempo)  | Lineare    | 11,395                      | 24 | ,475               |       |      |
|              | Quadratico | 10,255                      | 24 | ,427               |       |      |

### Test degli effetti fra soggetti

ura: mr

abile trasformata: Media

| urgente  | Somma dei quadrati Tipo III | df | Media dei quadrati | F       | Sig. |
|----------|-----------------------------|----|--------------------|---------|------|
| tercetta | 437,901                     | 1  | 437,901            | 317,791 | ,000 |
| uppi     | 12,088                      | 1  | 12,088             | 8,772   | ,007 |
| rore     | 33,071                      | 24 | 1,378              |         |      |

## medie marginali attese

### gruppi

#### Stime

ura: mr

| uppi | Media | Errore std. | Intervallo di confidenza 95% |                  |
|------|-------|-------------|------------------------------|------------------|
|      |       |             | Limite inferiore             | Limite superiore |
| 00   | 2,000 | ,175        | 1,638                        | 2,361            |
| 00   | 2,796 | ,204        | 2,375                        | 3,218            |

### Confronti a coppie

ura: mr

| gruppi (J) gruppi | Differenza fra medie (I-J) | Errore std. | Sig.(a) | Intervallo di confidenza per la differenza al 95%(a) |
|-------------------|----------------------------|-------------|---------|------------------------------------------------------|
|-------------------|----------------------------|-------------|---------|------------------------------------------------------|

|    |      |          |      |      | Limite inferiore | Limite superiore |
|----|------|----------|------|------|------------------|------------------|
| 00 | 2,00 | -,797(*) | ,269 | ,007 | -1,352           | -,242            |
| 00 | 1,00 | ,797(*)  | ,269 | ,007 | ,242             | 1,352            |

basato sulle medie marginali stimate  
 la differenza fra medie è significativa al livello ,05  
 correzione per confronti multipli: Bonferroni.

### Test univariati

variabile: mr

|           | Somma dei quadrati | df | Media dei quadrati | F     | Sig. |
|-----------|--------------------|----|--------------------|-------|------|
| Contrasto | 4,029              | 1  | 4,029              | 8,772 | ,007 |
| Totale    | 11,024             | 24 | ,459               |       |      |

Il test F verifica gli effetti semplici di gruppi all'interno di ogni combinazione di livelli degli altri effetti illustrati. Questi test sono basati su confronti a coppie indipendenti e lineari tra le medie marginali stimate.

## tempo

### Stime

variabile: mr

| tempo | Media | Errore std. | Intervallo di confidenza 95% |                  |
|-------|-------|-------------|------------------------------|------------------|
|       |       |             | Limite inferiore             | Limite superiore |
|       | 2,643 | ,177        | 2,278                        | 3,009            |
|       | 2,353 | ,191        | 1,958                        | 2,748            |
|       | 2,198 | ,148        | 1,892                        | 2,503            |

### Confronti a coppie

variabile: mr

| tempo (I) | (J) tempo | Differenza fra medie (I-J) | Errore std. | Sig.(a) | Intervallo di confidenza per la differenza al 95%(a) |                  |
|-----------|-----------|----------------------------|-------------|---------|------------------------------------------------------|------------------|
|           |           |                            |             |         | Limite inferiore                                     | Limite superiore |
| 2         | 3         | ,290                       | ,203        | ,498    | -,232                                                | ,812             |
| 3         | 1         | ,446                       | ,193        | ,091    | -,052                                                | ,943             |
| 1         | 3         | -,290                      | ,203        | ,498    | -,812                                                | ,232             |
| 3         | 1         | ,156                       | ,167        | 1,000   | -,275                                                | ,587             |
| 1         | 2         | -,446                      | ,193        | ,091    | -,943                                                | ,052             |
| 2         | 3         | -,156                      | ,167        | 1,000   | -,587                                                | ,275             |

basato sulle medie marginali stimate  
 correzione per confronti multipli: Bonferroni.

### Test multivariati

|                    | Valore | F        | Ipotesi df | Gradi di libertà dell'errore | Sig. |
|--------------------|--------|----------|------------|------------------------------|------|
| accia di Pillai    | ,181   | 2,546(a) | 2,000      | 23,000                       | ,100 |
| lambda di Wilks    | ,819   | 2,546(a) | 2,000      | 23,000                       | ,100 |
| accia di Hotelling | ,221   | 2,546(a) | 2,000      | 23,000                       | ,100 |
| indice di Roy      | ,221   | 2,546(a) | 2,000      | 23,000                       | ,100 |

scun F verifica l'effetto multivariato di tempo. Questi test sono basati sui confronti a coppie indipendenti e lineari tra le medie originali stimate.  
 statistica esatta

## gruppi \* tempo

### Stime

ura: mr

| gruppi | tempo | Media | Errore std. | Intervallo di confidenza 95% |                  |
|--------|-------|-------|-------------|------------------------------|------------------|
|        |       |       |             | Limite inferiore             | Limite superiore |
| 1,00   | 1     | 2,353 | ,230        | 1,877                        | 2,828            |
|        | 2     | 1,927 | ,249        | 1,414                        | 2,441            |
|        | 3     | 1,719 | ,193        | 1,321                        | 2,116            |
| 2,00   | 1     | 2,934 | ,269        | 2,379                        | 3,489            |
|        | 2     | 2,779 | ,291        | 2,179                        | 3,379            |
|        | 3     | 2,676 | ,225        | 2,212                        | 3,140            |

### Confronti a coppie

ura: mr

| tempo | (I) gruppi | (J) gruppi | Differenza fra medie (I-J) | Errore std. | Sig.(a) | Intervallo di confidenza per la differenza al 95%(a) |                  |
|-------|------------|------------|----------------------------|-------------|---------|------------------------------------------------------|------------------|
|       |            |            |                            |             |         | Limite inferiore                                     | Limite superiore |
| 1,00  | 2,00       | 1,00       | -,581                      | ,354        | ,114    | -1,312                                               | ,150             |
|       |            |            | ,581                       | ,354        | ,114    | -,150                                                | 1,312            |
| 1,00  | 2,00       | 2,00       | -,852(*)                   | ,383        | ,036    | -1,641                                               | -,062            |
|       |            |            | ,852(*)                    | ,383        | ,036    | ,062                                                 | 1,641            |
| 2,00  | 1,00       | 2,00       | -,958(*)                   | ,296        | ,004    | -1,569                                               | -,347            |
|       |            |            | ,958(*)                    | ,296        | ,004    | ,347                                                 | 1,569            |

basato sulle medie marginali stimate

una differenza fra medie è significativa al livello ,05

Correzione per confronti multipli: Bonferroni.

### Test univariati

ura: mr

| tempo     | Somma dei quadrati | df | Media dei quadrati | F     | Sig. |
|-----------|--------------------|----|--------------------|-------|------|
| Contrasto | 2,142              | 1  | 2,142              | 2,693 | ,114 |

|           |        |    |       |        |      |
|-----------|--------|----|-------|--------|------|
| Errore    | 19,092 | 24 | ,796  |        |      |
| Contrasto | 4,604  | 1  | 4,604 | 4,958  | ,036 |
| Errore    | 22,287 | 24 | ,929  |        |      |
| Contrasto | 5,821  | 1  | 5,821 | 10,470 | ,004 |
| Errore    | 13,342 | 24 | ,556  |        |      |

verifica l'effetto di gruppi. Questo test è basato sui confronti a coppie indipendenti e lineari tra le medie marginali stimate.

## gruppi \* tempo

### Stime

ura: mr

| gruppi | tempo | Media | Errore std. | Intervallo di confidenza<br>95% |                  |
|--------|-------|-------|-------------|---------------------------------|------------------|
|        |       |       |             | Limite inferiore                | Limite superiore |
| 00     | 1     | 2,353 | ,230        | 1,877                           | 2,828            |
|        | 2     | 1,927 | ,249        | 1,414                           | 2,441            |
|        | 3     | 1,719 | ,193        | 1,321                           | 2,116            |
| 00     | 1     | 2,934 | ,269        | 2,379                           | 3,489            |
|        | 2     | 2,779 | ,291        | 2,179                           | 3,379            |
|        | 3     | 2,676 | ,225        | 2,212                           | 3,140            |

### Confronti a coppie

ura: mr

| gruppi | (I) tempo | (J) tempo | Differenza fra<br>medie (I-J) | Errore std. | Sig.(a) | Intervallo di confidenza<br>per la differenza al<br>95%(a) |                  |
|--------|-----------|-----------|-------------------------------|-------------|---------|------------------------------------------------------------|------------------|
|        |           |           |                               |             |         | Limite inferiore                                           | Limite superiore |
| 00     | 1         | 2         | ,425                          | ,264        | ,360    | -,254                                                      | 1,105            |
|        |           | 3         | ,634                          | ,252        | ,056    | -,014                                                      | 1,282            |
|        | 2         | 1         | -,425                         | ,264        | ,360    | -1,105                                                     | ,254             |
|        |           | 3         | ,209                          | ,218        | 1,000   | -,352                                                      | ,769             |
|        | 3         | 1         | -,634                         | ,252        | ,056    | -1,282                                                     | ,014             |
|        |           | 2         | -,209                         | ,218        | 1,000   | -,769                                                      | ,352             |
| 00     | 1         | 2         | ,155                          | ,308        | 1,000   | -,639                                                      | ,948             |
|        |           | 3         | ,257                          | ,294        | 1,000   | -,499                                                      | 1,013            |
|        | 2         | 1         | -,155                         | ,308        | 1,000   | -,948                                                      | ,639             |
|        |           | 3         | ,103                          | ,254        | 1,000   | -,552                                                      | ,757             |
|        | 3         | 1         | -,257                         | ,294        | 1,000   | -1,013                                                     | ,499             |
|        |           | 2         | -,103                         | ,254        | 1,000   | -,757                                                      | ,552             |

basato sulle medie marginali stimate

Correzione per confronti multipli: Bonferroni.

### Test multivariati

|    |                      | Valore | F        | Ipotesi df | Gradi di libertà dell'errore | Sig. |
|----|----------------------|--------|----------|------------|------------------------------|------|
| 00 | Traccia di Pillai    | ,209   | 3,043(a) | 2,000      | 23,000                       | ,067 |
|    | Lambda di Wilks      | ,791   | 3,043(a) | 2,000      | 23,000                       | ,067 |
|    | Traccia di Hotelling | ,265   | 3,043(a) | 2,000      | 23,000                       | ,067 |
|    | Radice di Roy        | ,265   | 3,043(a) | 2,000      | 23,000                       | ,067 |
| 00 | Traccia di Pillai    | ,031   | ,371(a)  | 2,000      | 23,000                       | ,694 |
|    | Lambda di Wilks      | ,969   | ,371(a)  | 2,000      | 23,000                       | ,694 |
|    | Traccia di Hotelling | ,032   | ,371(a)  | 2,000      | 23,000                       | ,694 |
|    | Radice di Roy        | ,032   | ,371(a)  | 2,000      | 23,000                       | ,694 |

scun F verifica gli effetti multivariati semplici di tempo all'interno di ogni combinazione di livelli degli effetti illustrati. Questi test sono  
ati sui confronti a coppie indipendenti e lineari tra le medie marginali stimate.

statistica esatta
